# Supplementary material for: Looking for a Signal in the Noise: Revisiting Obesity and the Microbiome
Source: PubMed Central journal article supplement (PMC4999546; doi:10.1128/mbio.01018-16), 2016-08-23

### Phylum

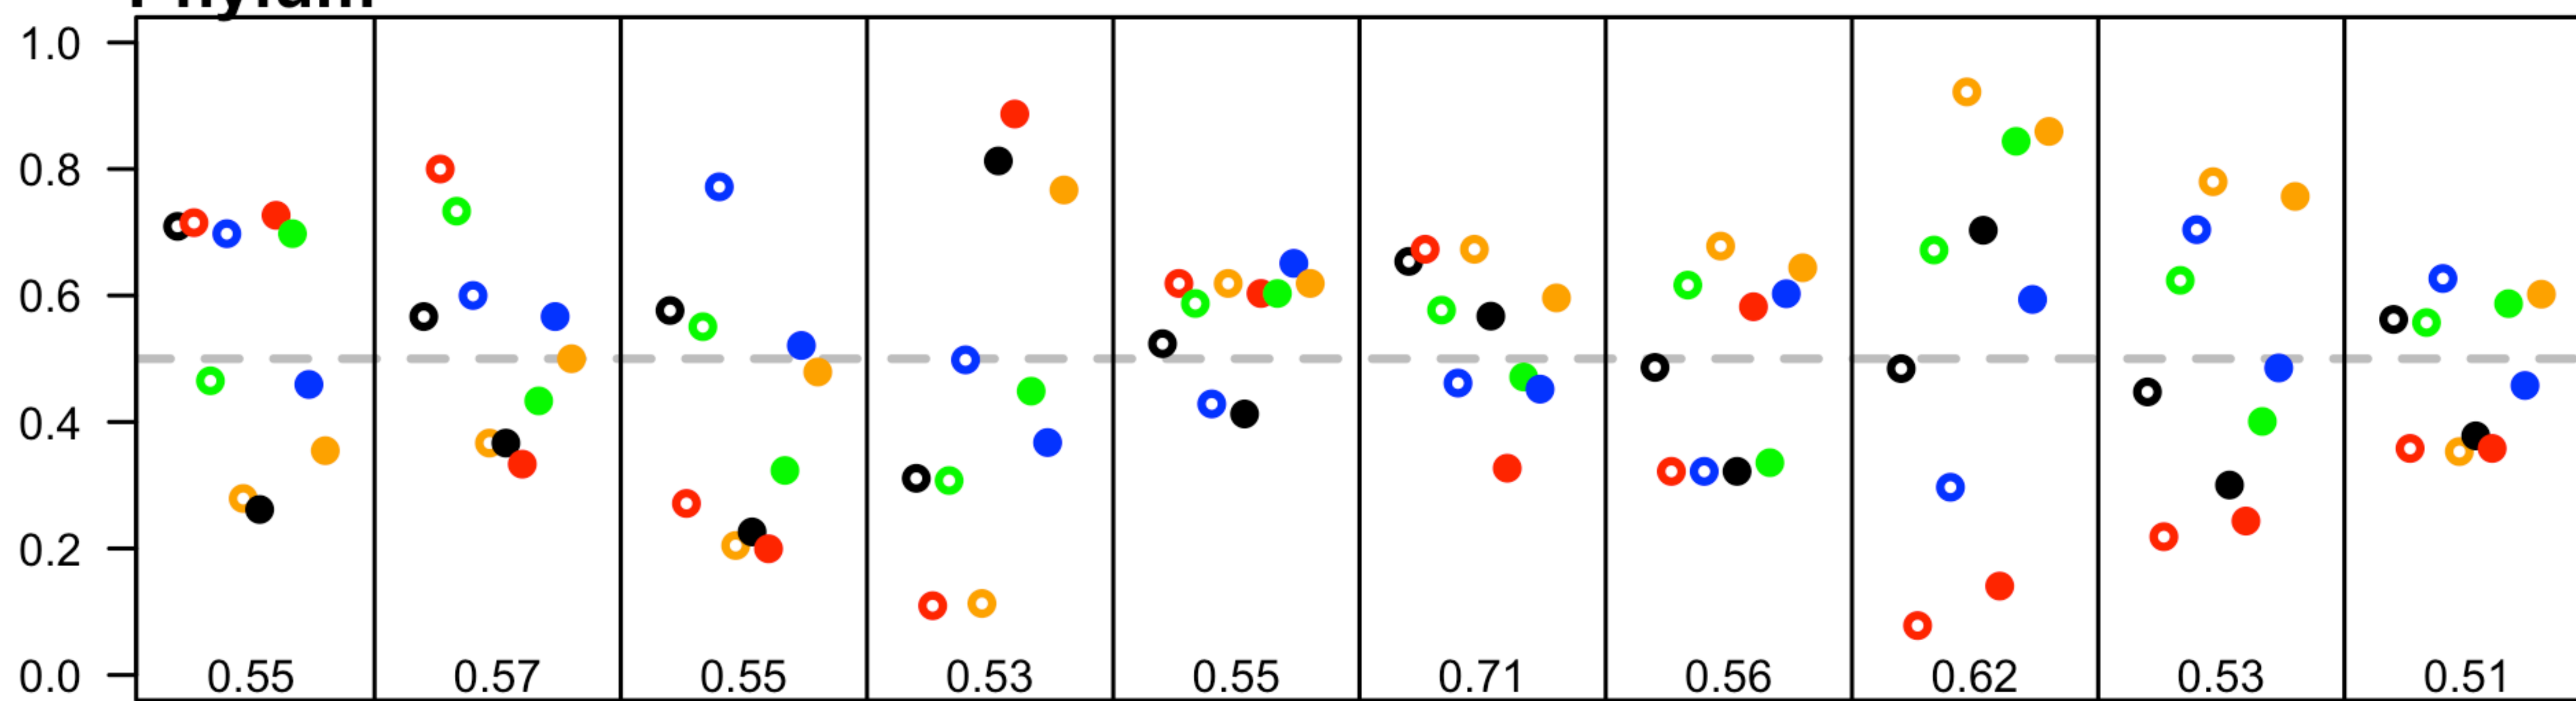

### Class

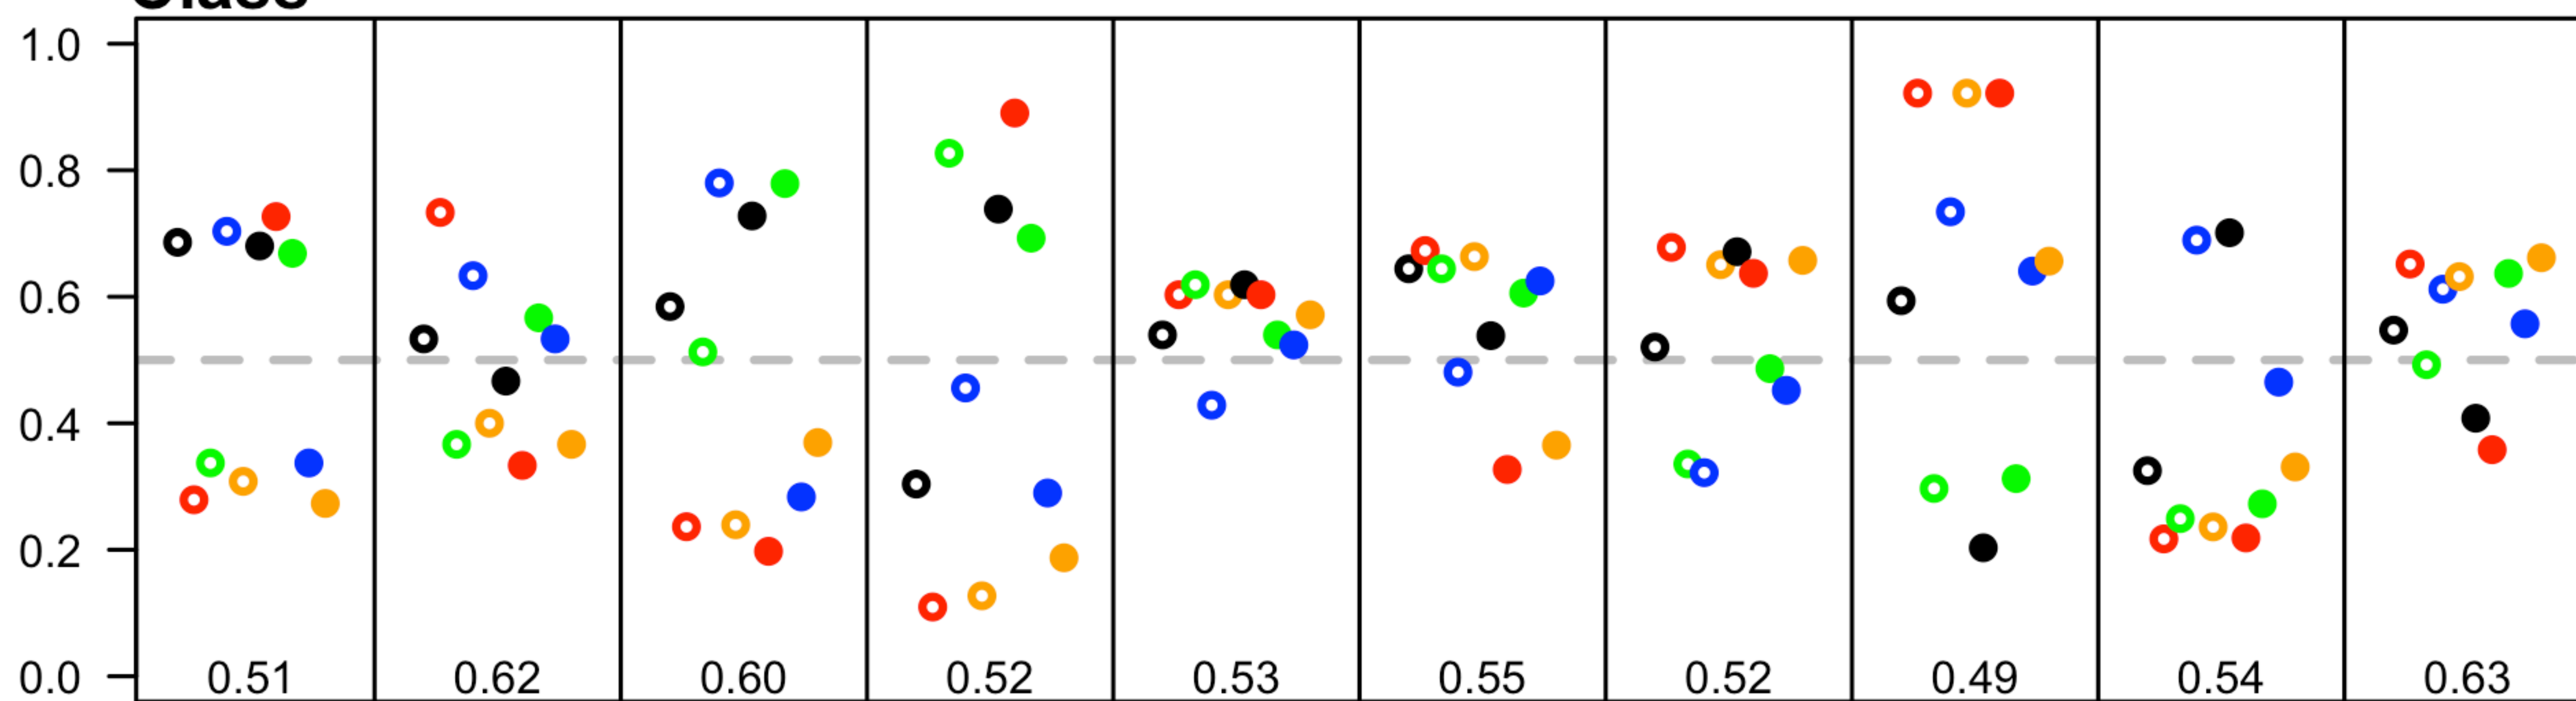

### Order

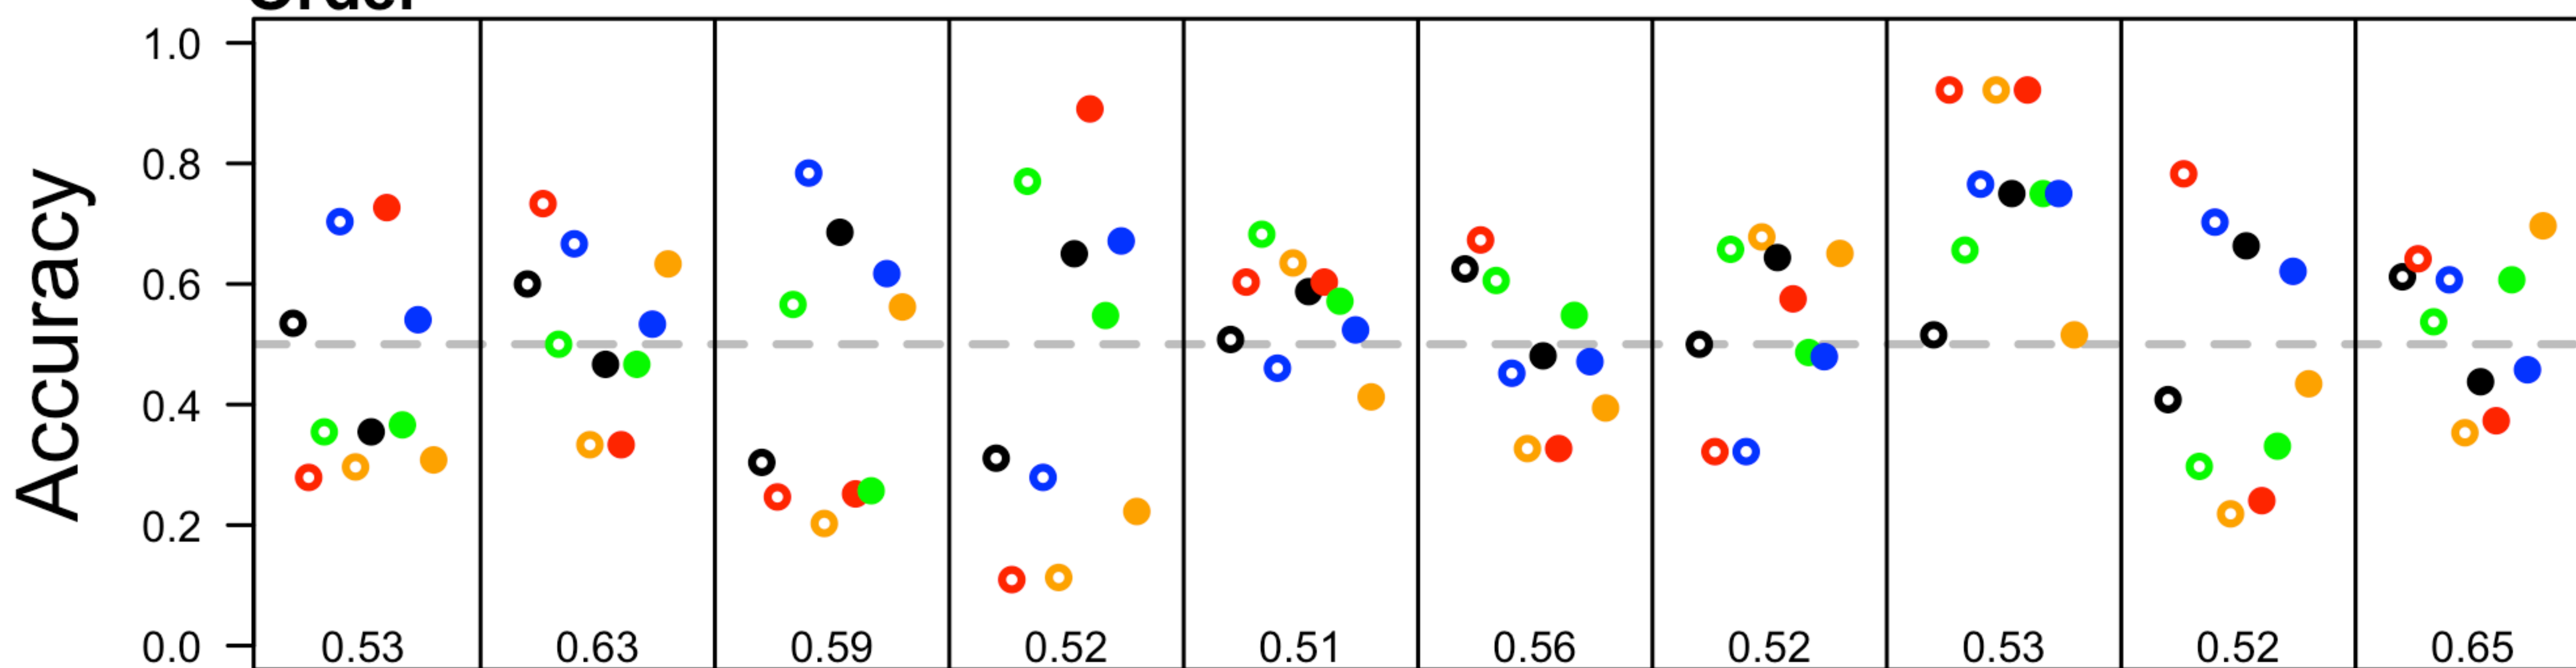

### Family

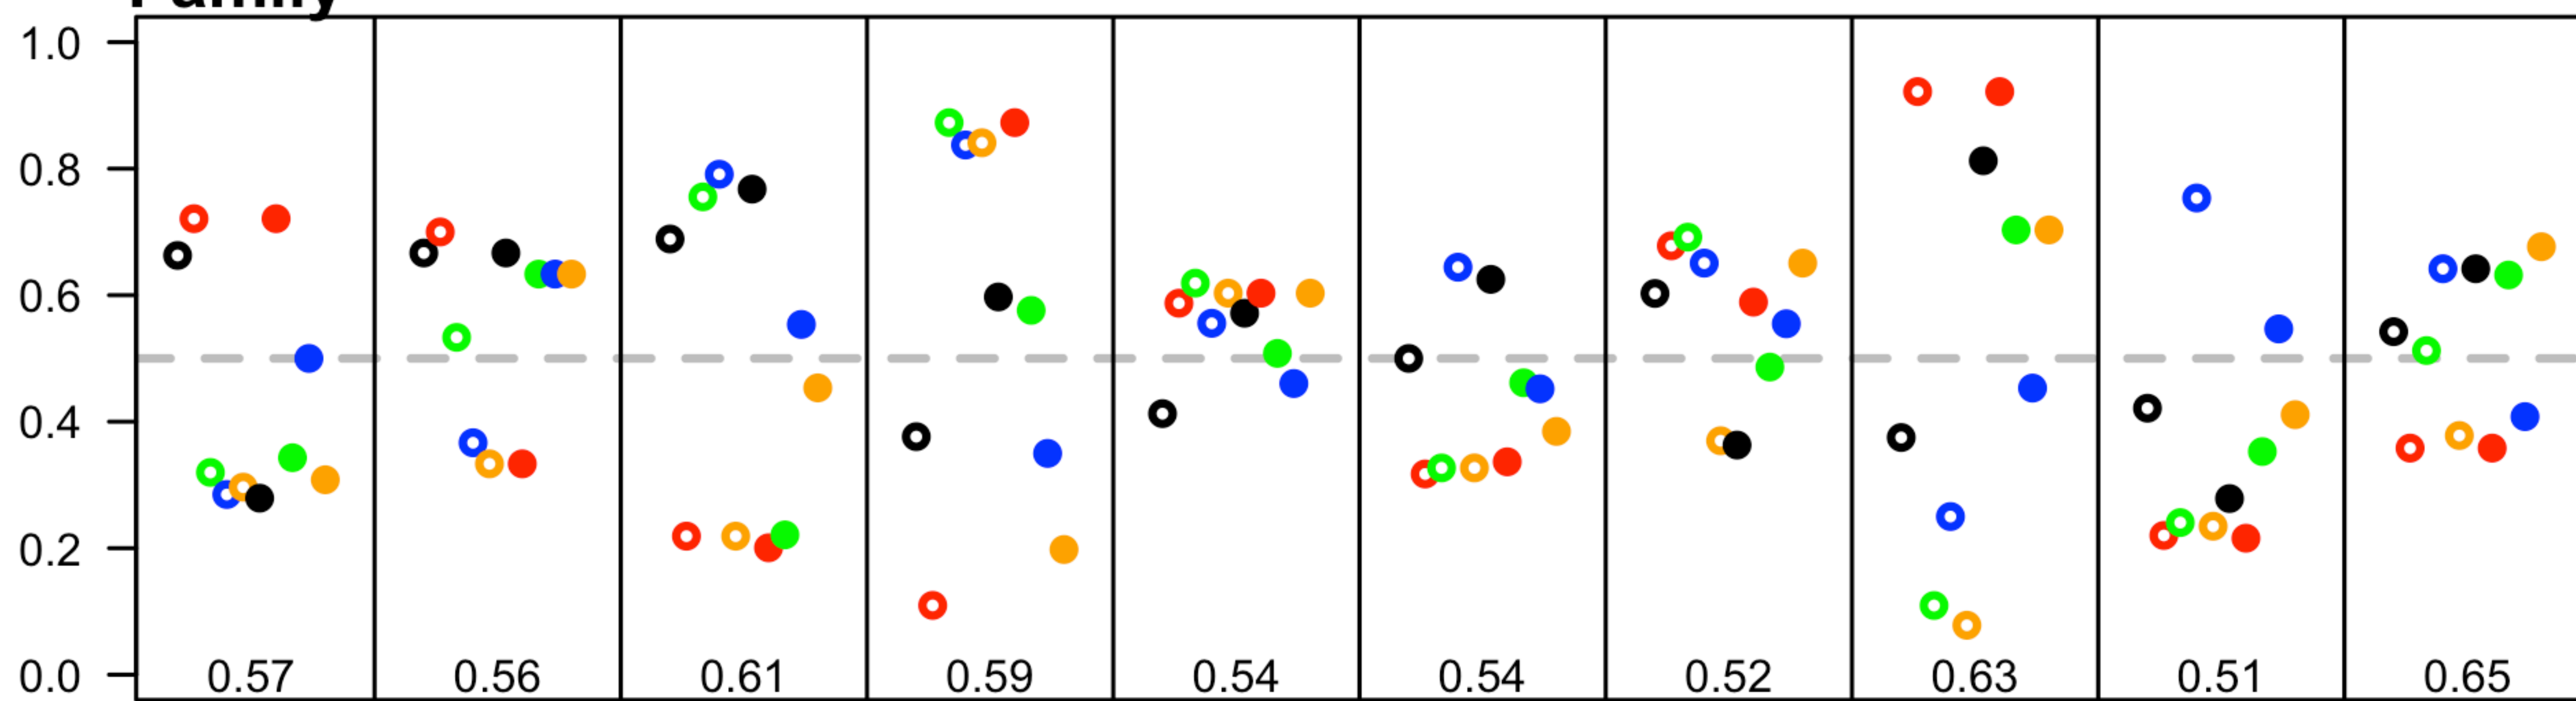

### Genus

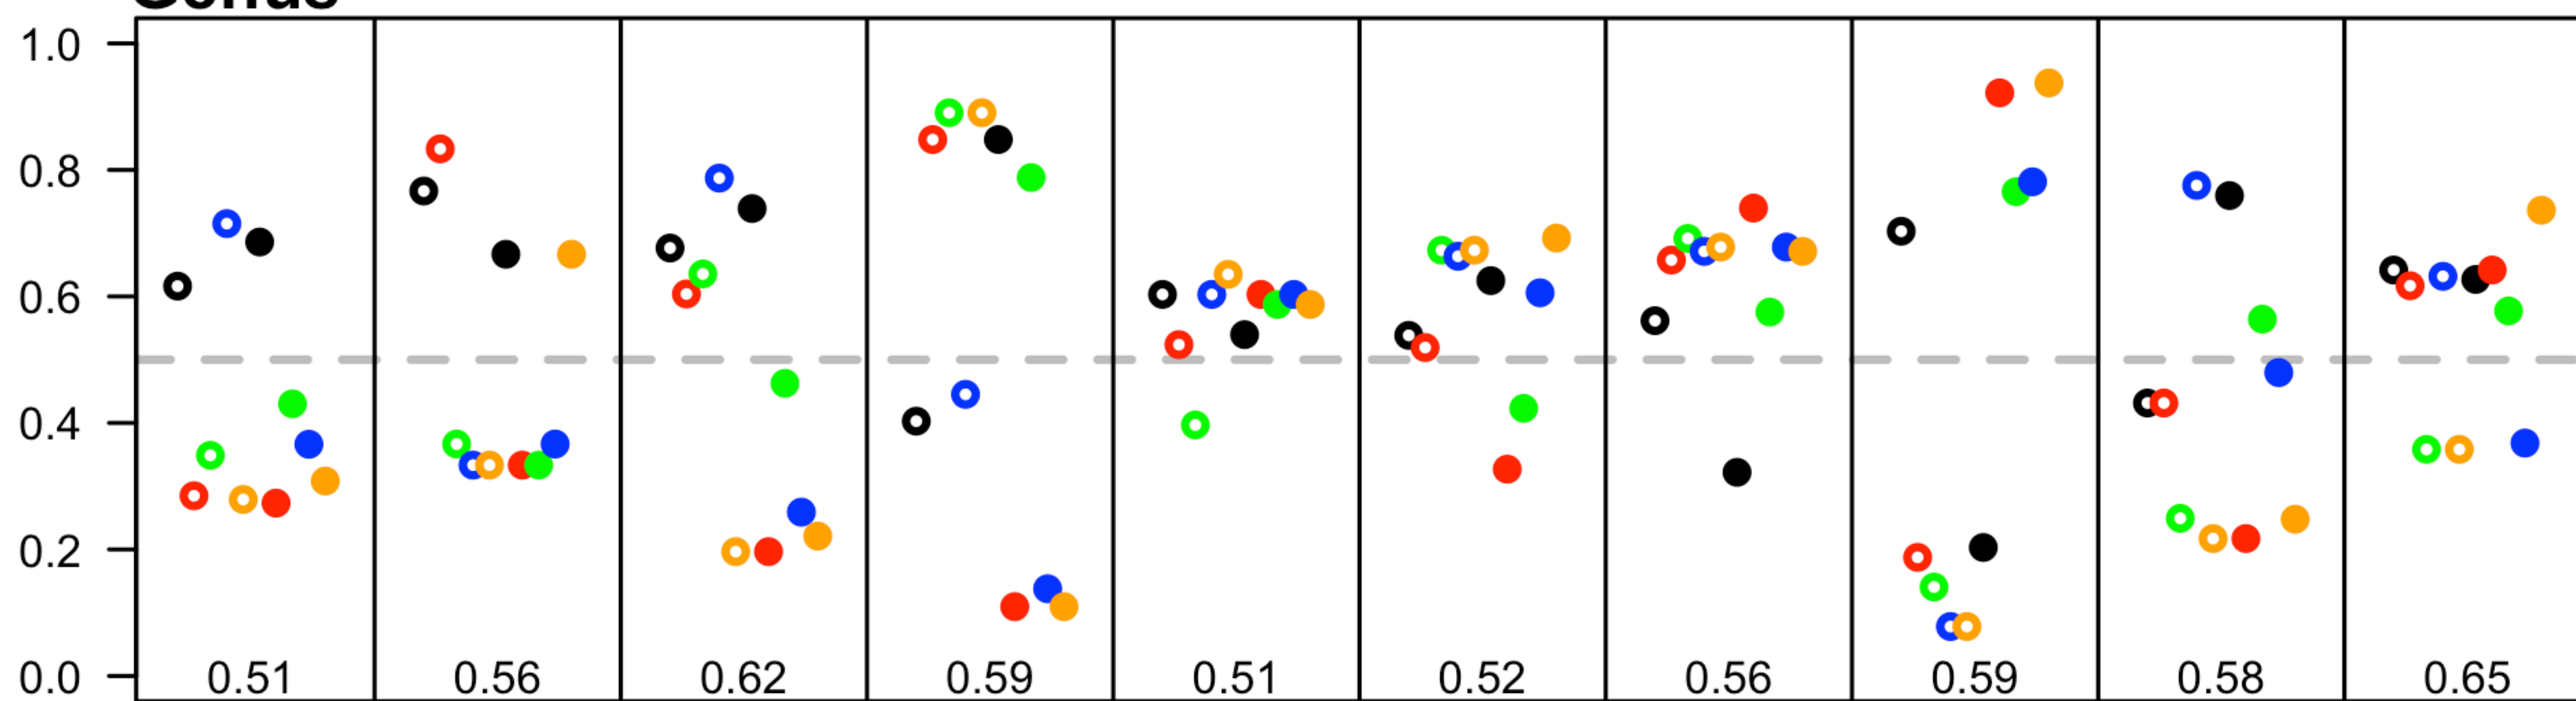

Baxter

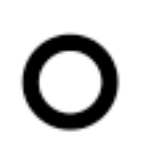

Escobar

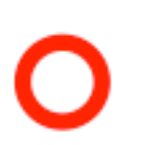

Goodrich

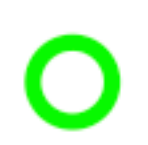

HMP

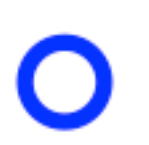

Ross

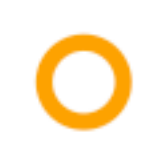

Schubert

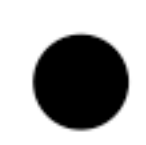

Turnbaugh

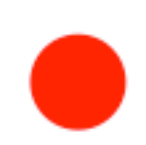

Wu

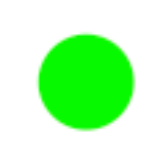

Zeevi

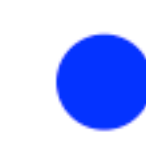

Zupancic

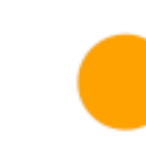

Supplement: mbo004162954sf4.pdf [file mbo004162954sf4.pdf]
