# Supplementary material for: Looking for a Signal in the Noise: Revisiting Obesity and the Microbiome
Source: PubMed Central journal article supplement (PMC4999546; doi:10.1128/mbio.01018-16), 2016-08-23

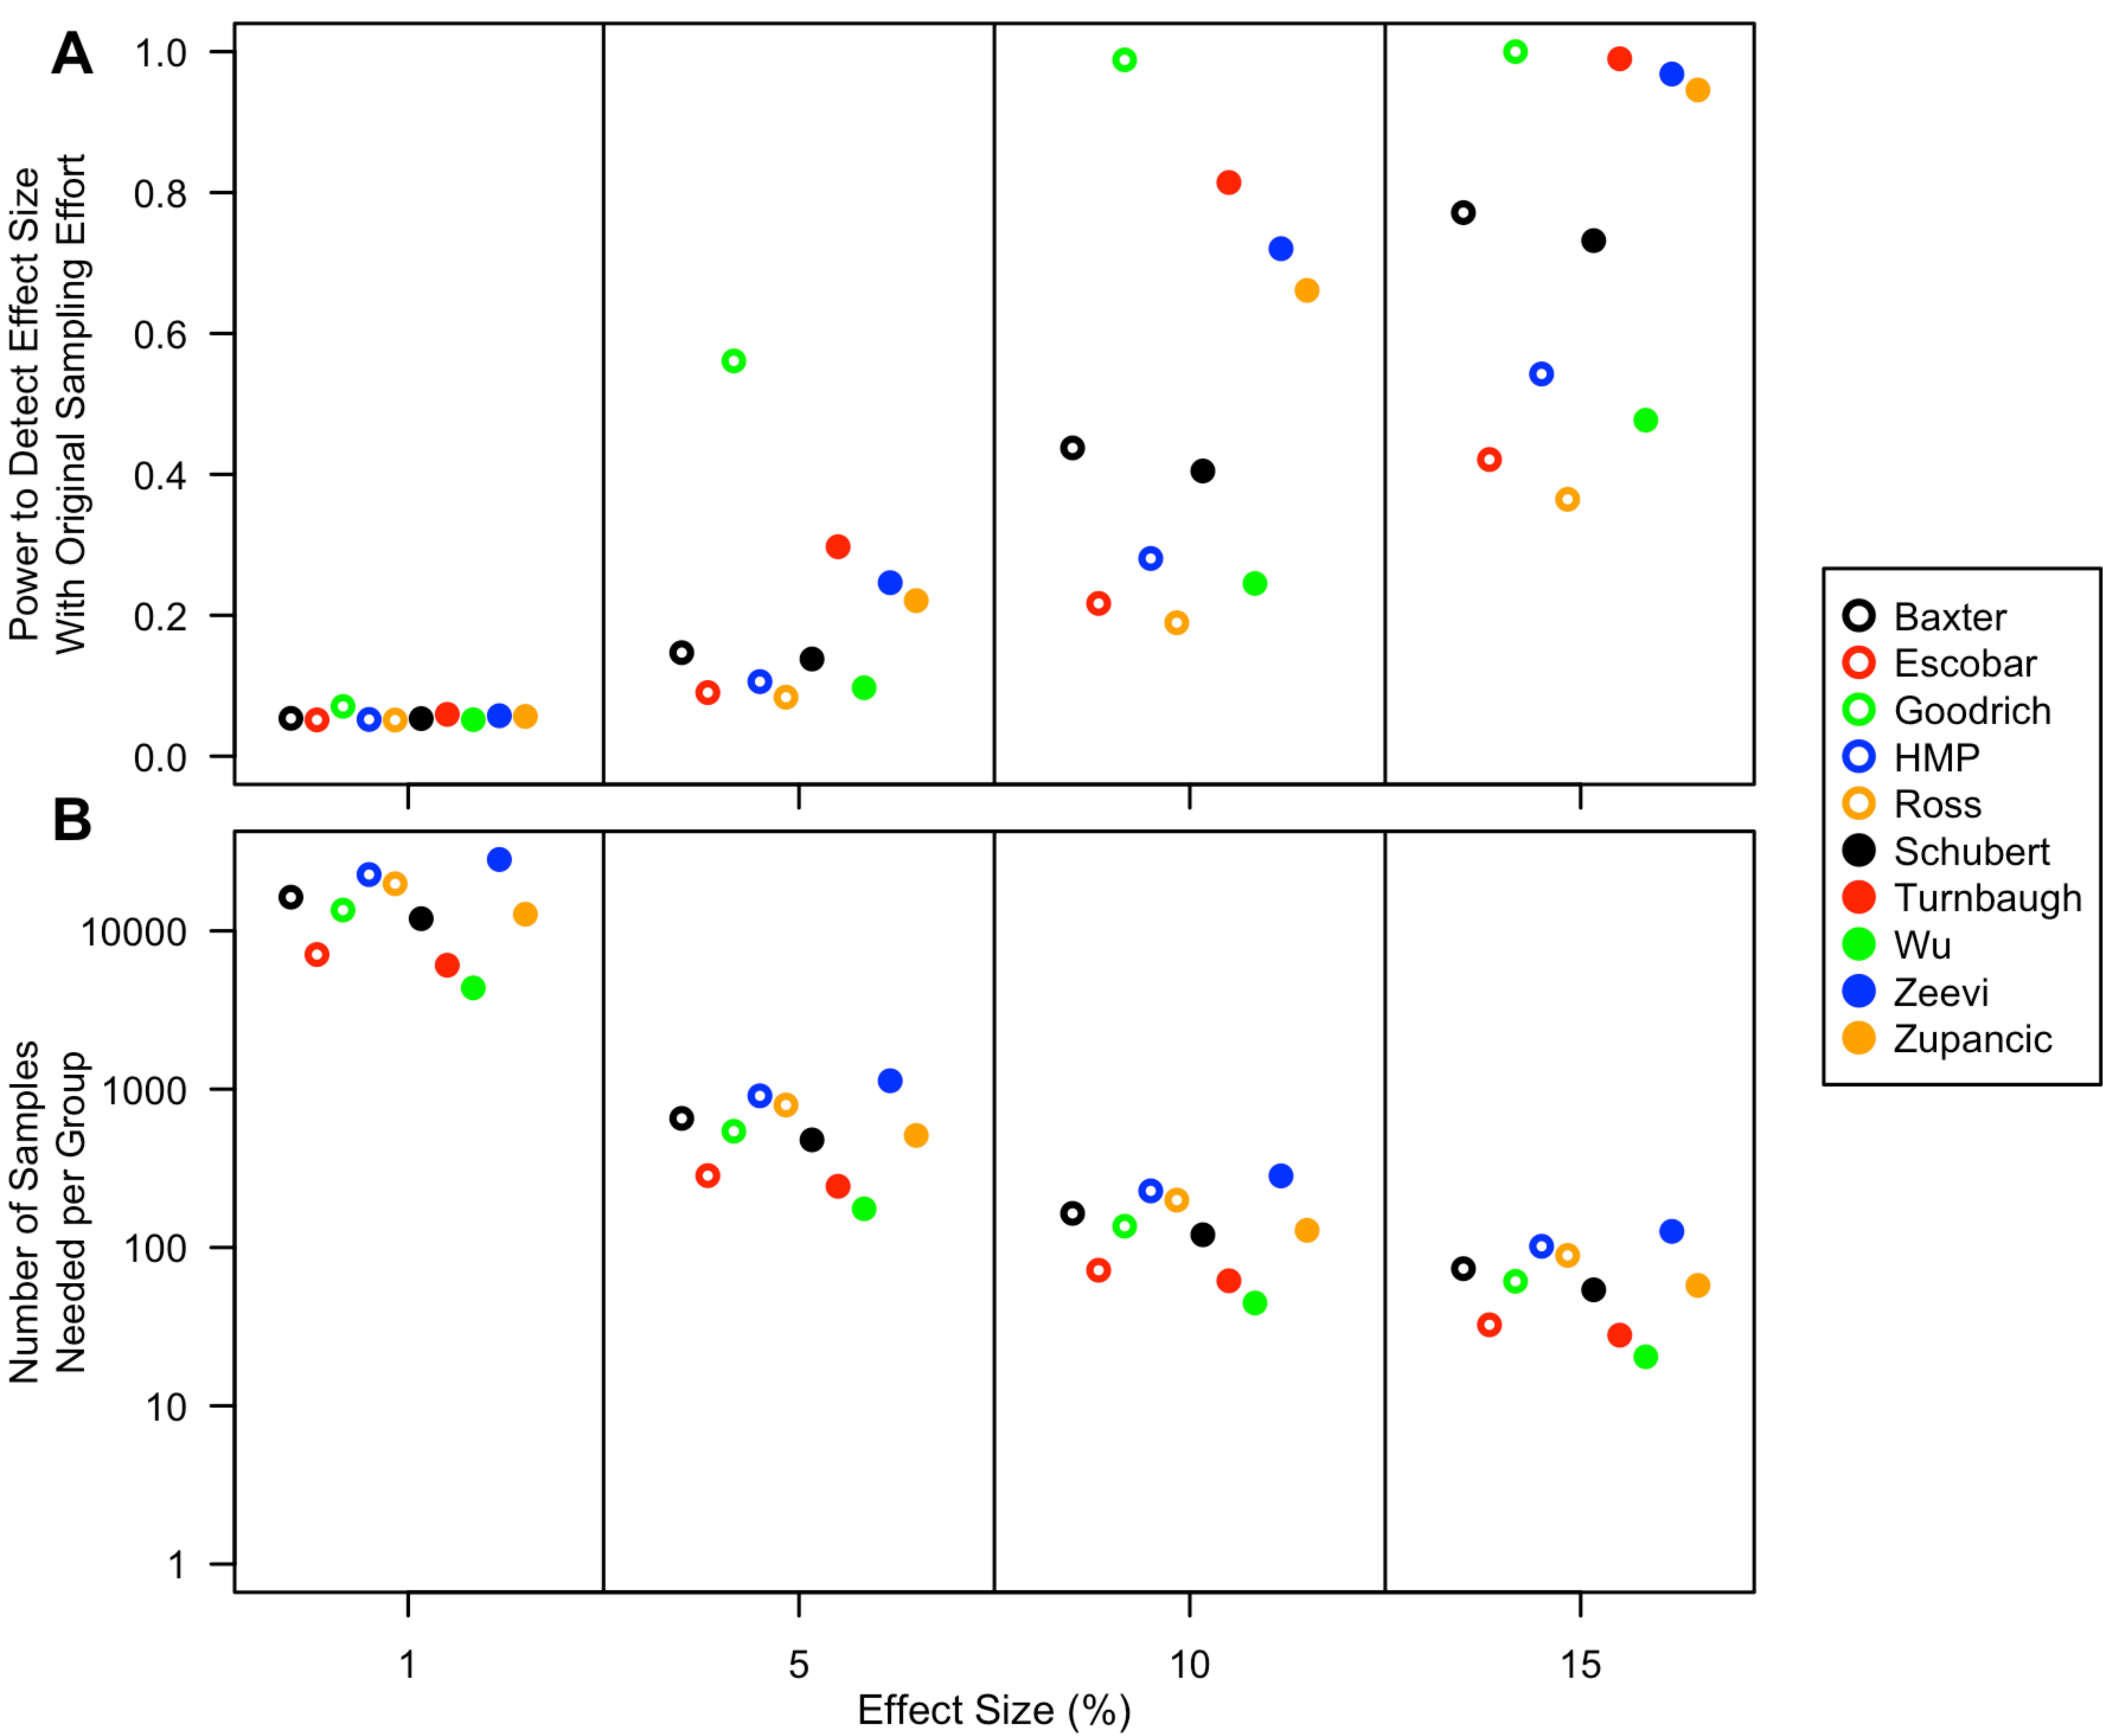

Supplement: mbo004162954sf6.pdf [file mbo004162954sf6.pdf]
